# Supplementary material for: The Ustilago hordei–Barley Interaction is a Versatile System for Characterization of Fungal Effectors
Source: J Fungi (Basel). 2021 Jan 27;7(2):86. doi: 10.3390/jof7020086 (PMC7912019; doi:10.3390/jof7020086)
Supplement: Supplementary file 1 [file jof-07-00086-s001.zip]

Archive with 4 entries (4 files):
- Supplementary Material Okmen et al 2020.pdf
- __MACOSX/._Supplementary Material Okmen et al 2020.pdf
- Table S1.xlsx
- __MACOSX/._Table S1.xlsx
